# Supplementary material for: A dual-wavelength electrochromic film based on a Pt(ii) complex for optical modulation at telecommunication wavelengths and dark solid-state display devices
Source: Royal Society of Chemistry journal article supplement (doi:10.1039/d1tc01425k), 2021-01-01
Supplement: d1tc01425k1.pdf [file d1tc01425k1.pdf]

## **Supporting Information for:**

### **A Dual-Wavelength Electrochromic Film Based on Pt(II) Complex for Optical Modulation at Telecommunication Wavelength and Dark Solid-State Display Device**

Qiaozhen Pi,<sup>a,b</sup> Dongqin Bi,<sup>a</sup> Dongfang Qiu,<sup>\*a</sup> Hongwei Wang,<sup>a</sup> Xinfeng Cheng,<sup>a</sup> Yuquan Feng,<sup>a</sup>

Qian Zhao,<sup>a</sup> and Mingdong Zhou<sup>\*b</sup>

*<sup>a</sup>College of Chemistry and Pharmacy Engineering, Nanyang Normal University,  
Nanyang, 473061, P. R. China*

*<sup>b</sup>School of Petrochemical Engineering, Liaoning Petrochemical University, Fushun,  
113001, P. R. China*

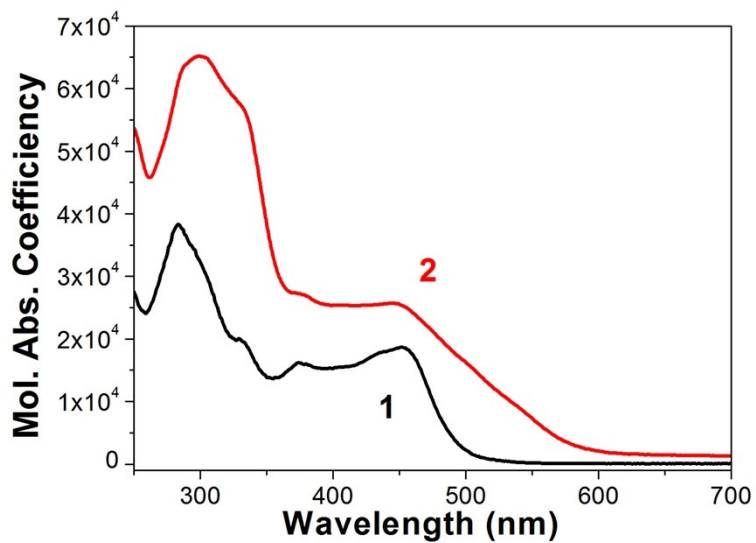

**Figure S1.** UV-vis absorption spectra of the parent complex [(L)PtCl] (**1**) and the target complex [(L)Pt(C≡C-ph)] (**2**) in CH<sub>2</sub>Cl<sub>2</sub> solution.

**Table S1.** Photophysical properties of the parent and target complexes.<sup>a</sup>

| Complex         | $\lambda_{\text{max, abs}}$ (nm)<br>( $\epsilon \times 10^4 \text{ dm}^3 \cdot \text{mol}^{-1} \cdot \text{cm}^{-1}$ ) | $\lambda_{\text{max, em}}^b$<br>(nm) | $\Phi_{\text{em}}^c$ | $\tau_{\text{em}}^c$<br>( $\mu\text{s}$ ) |
|-----------------|------------------------------------------------------------------------------------------------------------------------|--------------------------------------|----------------------|-------------------------------------------|
| [(L)PtCl]       | 452(1.87), 435(1.78), 374(1.62),<br>326(2.01), 283(3.83)                                                               | 590                                  | 0.009                | 10.6                                      |
| [(L)Pt(C≡C-ph)] | 445(broad, 2.75), 377(2.83),<br>335(sh, 5.85), 286 (6.54)                                                              | 607                                  | 0.021                | 11.1                                      |

<sup>a</sup> Measured in an air-saturated CH<sub>2</sub>Cl<sub>2</sub> solution at room temperature. <sup>b</sup> Excited wavelength is 450 nm. <sup>c</sup> PL quantum yields and lifetime.

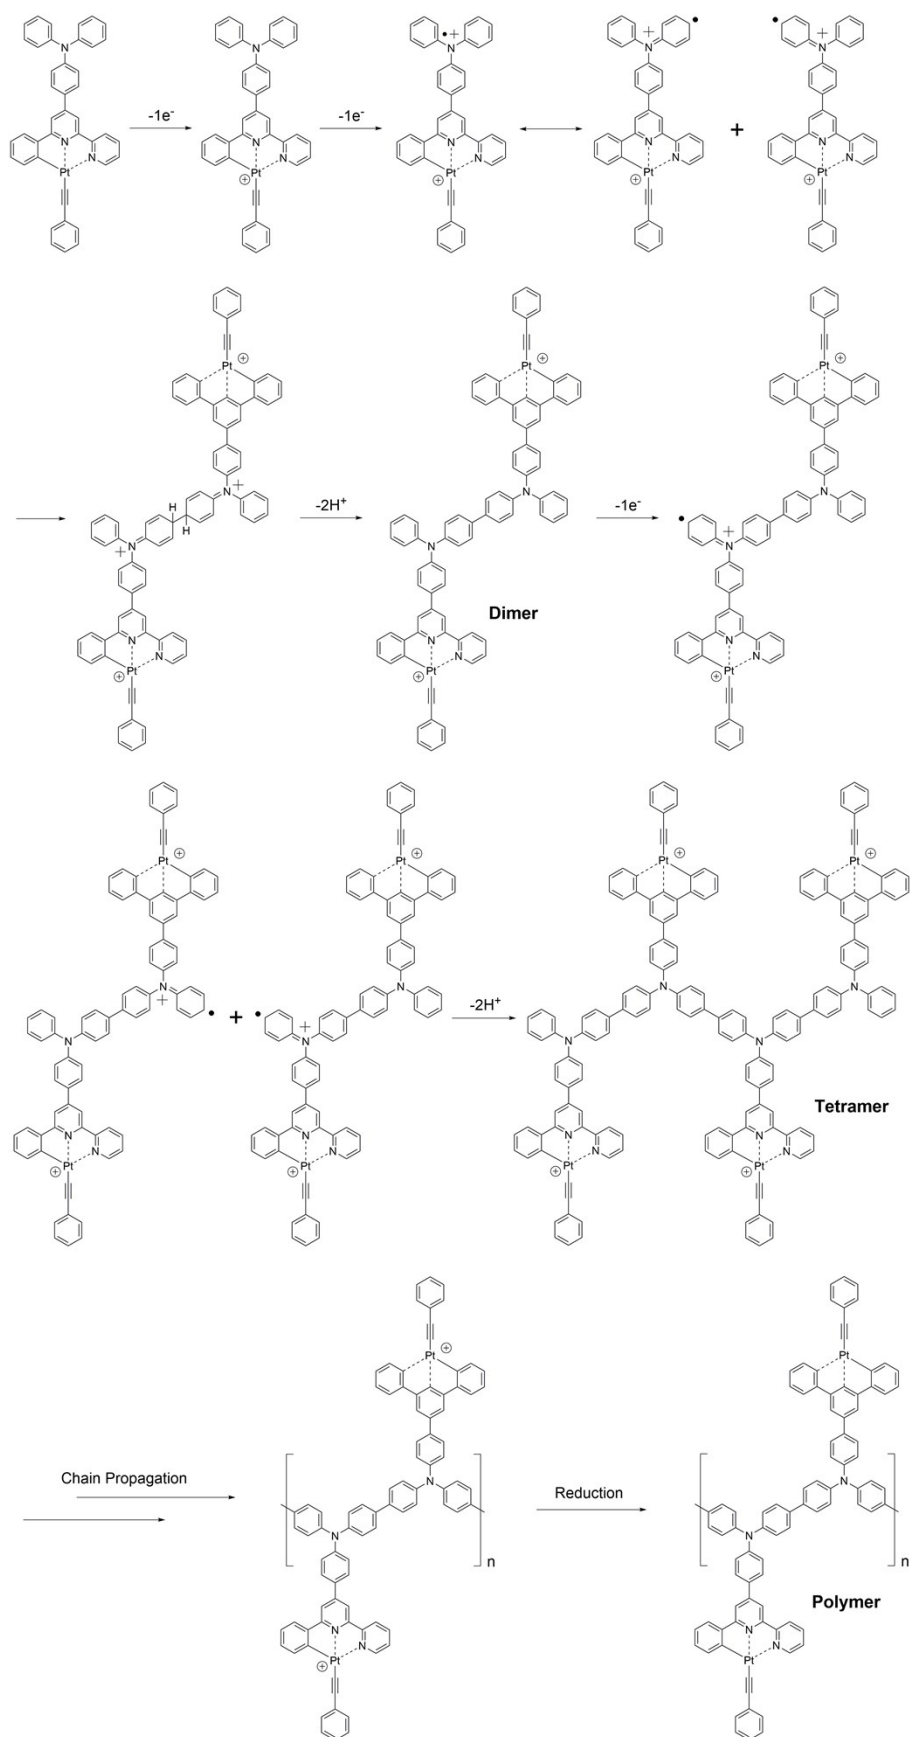

**Scheme S1.** Proposed EP mechanism of the target complex.

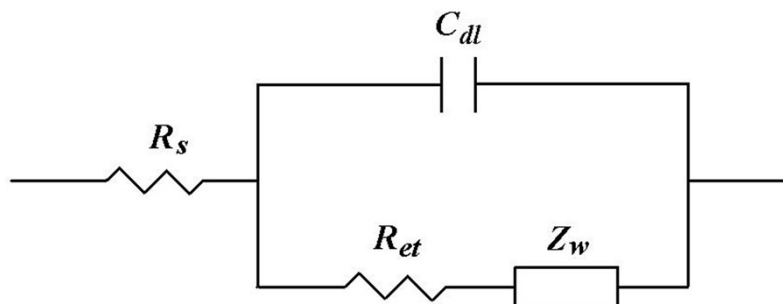

**Figure S2.** The equivalent circuit proposed for the EP film coated ITO electrode.

**Table S2.** Solution resistance ( $R_s$ ), electron transfer resistance ( $R_{et}$ ) and capacity ( $C_{dl}$ ) of the EP film coated ITO electrodes prepared by various EP cycles.

| Electrode name | $R_s$ ( $\Omega$ ) | $R_{et}$ ( $\Omega$ ) | $C_{dl}$ (F/cm <sup>2</sup> ) |
|----------------|--------------------|-----------------------|-------------------------------|
| EP-5           | 40.6               | 385.9                 | $1.6 \times 10^{-9}$          |
| EP-10          | 40.7               | 397.5                 | $1.5 \times 10^{-9}$          |
| EP-15          | 41.0               | 503.4                 | $1.0 \times 10^{-9}$          |
| EP-20          | 35.4               | 451.3                 | $1.2 \times 10^{-9}$          |
| EP-25          | 32.2               | 384.9                 | $1.4 \times 10^{-9}$          |

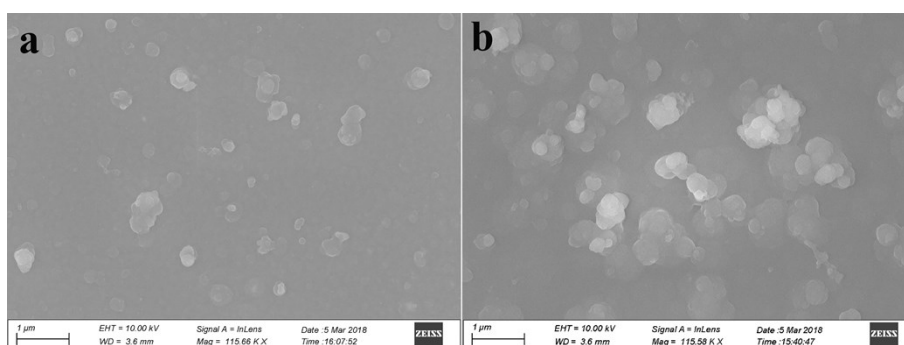

**Figure S3.** FESEM images of the EP film coated ITO electrodes obtained after 5 (a) and 25 (b) EP cycles, respectively.

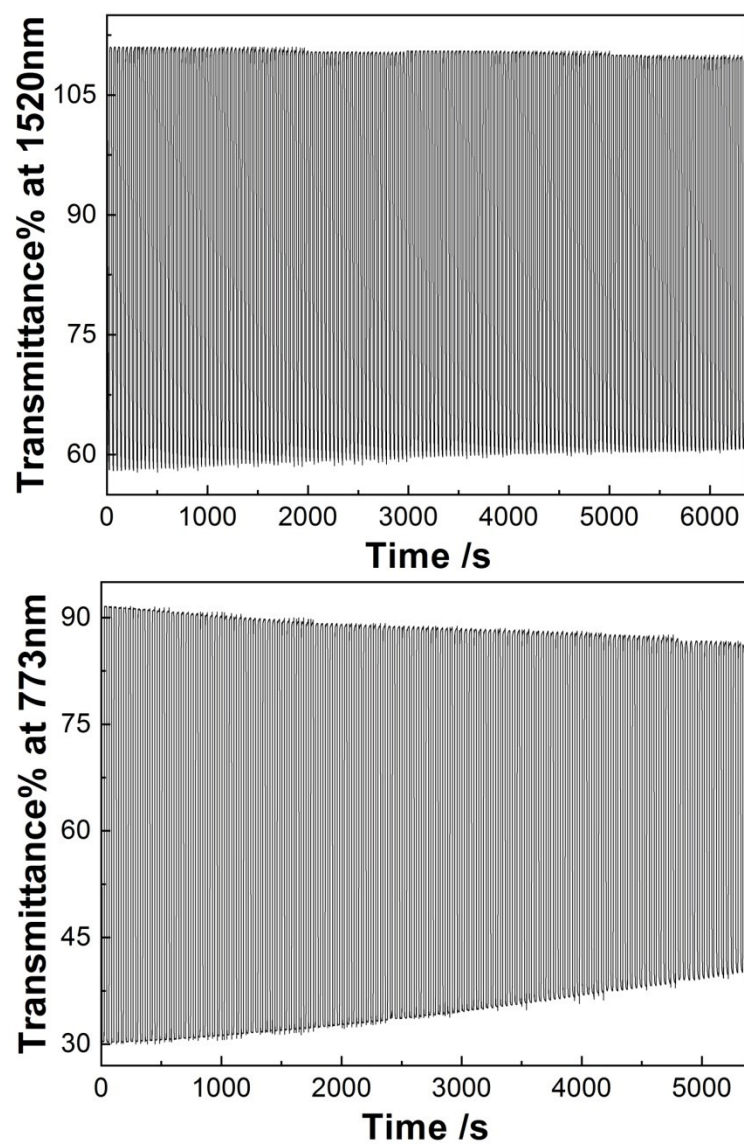

**Figure S4.** Dynamic changes of the transmittance of the EP film coated ITO electrode at 1520 nm upon switching the potential between -0.5 and +1.0 V (top) and at 773 nm (bottom) upon switching the potential between -0.5 and +1.4 V with a pulse width of 20 s.

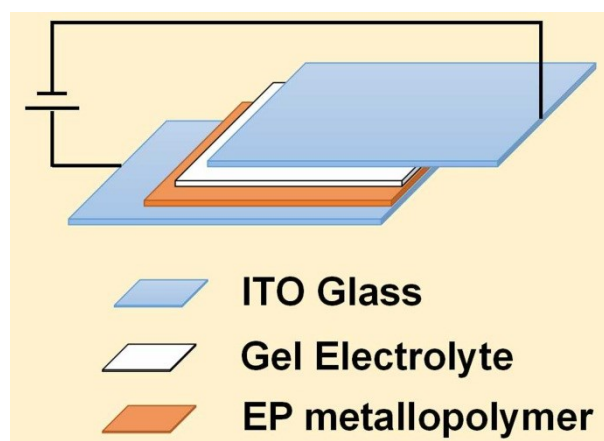

**Figure S5.** Schematic graph of the solid-state EC device construction.

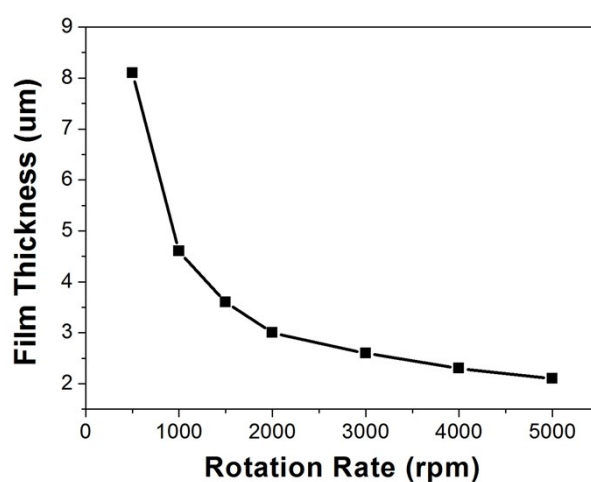

**Figure S6.** Relationship between the gel electrolyte film thickness and the spin-coating rate.

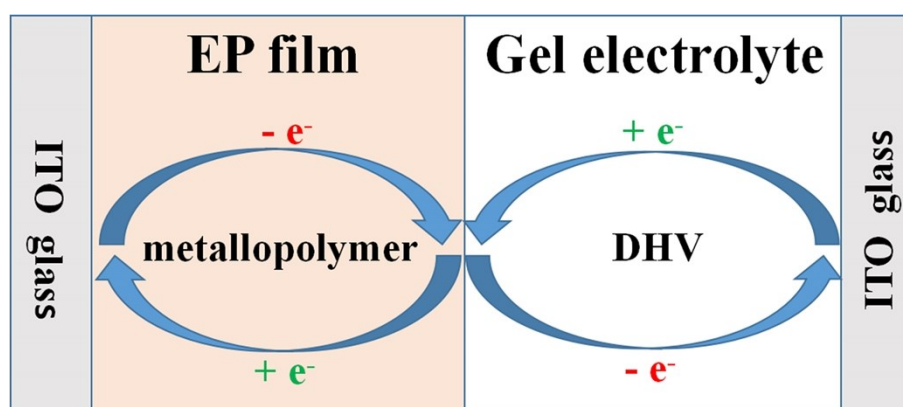

**Scheme S2.** Redox reaction cycle between anodic EC metallopolymer and cathodic EC DHV at the interface of the EP polymer and gel electrolyte films.
